# Supplementary material for: Context-dependent correlation between resting metabolic rate and daily energy expenditure in wild chipmunks
Source: Oxford University Press journal article supplement (doi:10.1242/jeb.076794), 2012-01-01
Supplement: jeb076794-sup-jeb076796.pdf [file jeb076794-sup-jeb076796.pdf]

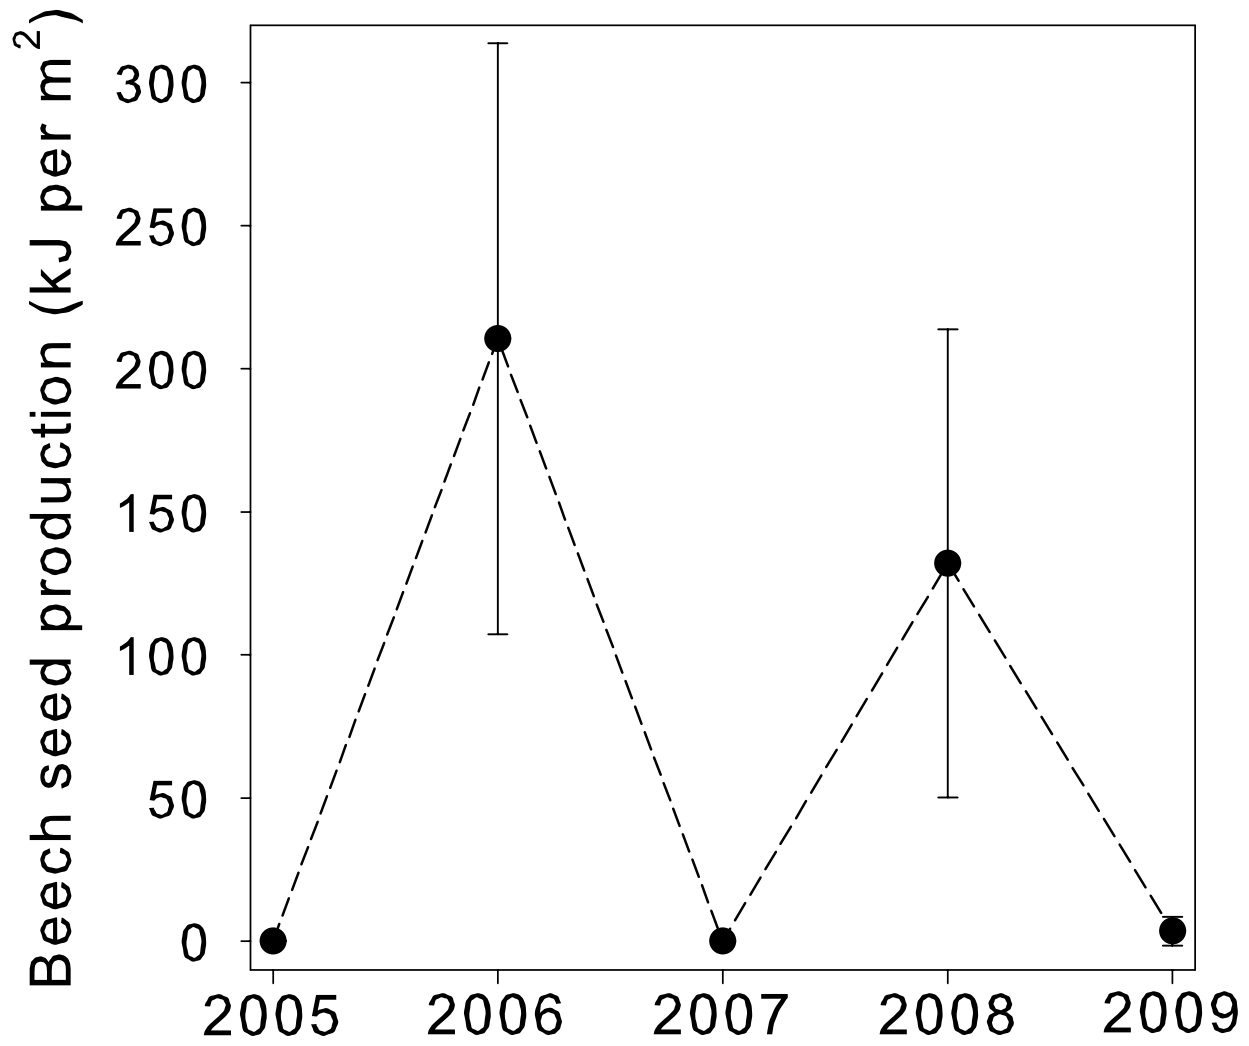

**Fig. S1.** Annual productivity ( $\pm 95\%$  confidence intervals) in seed energy content collected under American beech, the main masting tree species in southern Québec, Canada (see text for details).

Table S1. Sample size ( $N$ ), effect size (estimate), standard error (s.e.), and  $r^2$  of the relationship between resting metabolic rate (RMR) and daily energy expenditure (DEE) according to the number of days elapsed between the two measurements (period; ranging from 1 to 108 days; median 29 days)

| Period    | $N$ | Whole animal |      |       | Mass independent |      |       |
|-----------|-----|--------------|------|-------|------------------|------|-------|
|           |     | Estimate     | s.e. | $r^2$ | Estimate         | s.e. | $r^2$ |
| <10 days  | 8   | 2.9          | 2.55 | 0.177 | 4.57             | 3.29 | 0.244 |
| <20 days  | 12  | 2.12         | 1.67 | 0.139 | 2.36             | 1.99 | 0.123 |
| <30 days  | 24  | 2.28         | 1.13 | 0.156 | 1.52             | 1.11 | 0.078 |
| <40 days  | 30  | 2.14         | 0.98 | 0.146 | 1.52             | 0.94 | 0.086 |
| <50 days  | 39  | 3.18         | 0.93 | 0.242 | 2.34             | 0.89 | 0.155 |
| <60 days  | 43  | 2.88         | 0.92 | 0.194 | 1.92             | 0.88 | 0.103 |
| <70 days  | 44  | 2.84         | 0.89 | 0.194 | 1.86             | 0.90 | 0.100 |
| <80 days  | 45  | 2.54         | 0.88 | 0.163 | 1.71             | 0.90 | 0.077 |
| <90 days  | 47  | 2.22         | 0.93 | 0.113 | 1.47             | 0.91 | 0.054 |
| <100 days | 48  | 2.07         | 0.92 | 0.099 | 1.39             | 0.90 | 0.049 |
| <110 days | 51  | 1.53         | 0.87 | 0.059 | 1.10             | 0.85 | 0.033 |

Relationships are shown for both whole-animal and mass-independent levels (residuals from the correlation against body mass). RMR and DEE were measured within the same year on 51 occasions on a total of 43 individuals. The effect size (regression estimate) of the relationship between DEE and RMR was maximized when the time elapsed between the two measurements was < 50 days. Of the nine new DEE measurements that were added for the <50 day period, eight were taken during reproduction.
